# Supplementary material for: An immune-shift induced by lycopene; from an eosinophil-dominant type towards an eosinophil/neutrophil-co-dominant type of airway inflammation
Source: Royal Society of Chemistry journal article supplement (doi:10.1039/d2fo00875k), 2022-01-01
Supplement: d2fo00875k1.pdf [file d2fo00875k1.pdf]

**Supplementary table 1:** The concentration of lipid mediators in lung samples from RWE-sensitized / PBS-challenged mice (M-) (n=6) and RWE-sensitized / RWE-challenged mice (M+) (n=6) were measured by HPLC-MS-MS. Results in ng/g lung tissue are expressed as mean ± SEM. The numbers in bold letters represent significant differences vs. RWE-challenged animals ( $P < 0.05$ , Mann-Whitney test). For abbreviations, see materials and methods.

|                     | <b>M-</b> (conc. in ng/g) |          | <b>M+</b> (conc. in ng/g) |                    | <b>Significance</b> |
|---------------------|---------------------------|----------|---------------------------|--------------------|---------------------|
| <b>AA</b>           | 1454.2                    | ± 404.6  | <b>976.3</b>              | <b>± 130.80.02</b> |                     |
| <b>5-HETE</b>       | 16.7                      | ± 10.7   | 19.1                      | ± 3.8              | 0.62                |
| <b>8-HETE</b>       | 2.91                      | ± 17.0   | 42.2                      | ± 14.9             | 0.13                |
| <b>11-HETE</b>      | 284.7                     | ± 73.9   | 224.1                     | ± 109.2            | 0.29                |
| <b>12-HETE</b>      | 3169.3                    | ± 1051.0 | 3563.1                    | ± 394.9            | 0.41                |
| <b>15-HETE</b>      | 375.5                     | ± 94.0   | 490.8                     | ± 162.4            | 0.16                |
| <b>20-HETE</b>      | 2.5                       | ± 1.7    | 2.9                       | ± 1.6              | 0.66                |
| <b>LTB4</b>         | 9.4                       | ± 4.9    | <b>37.4</b>               | <b>± 27.2</b>      | <b>0.03</b>         |
| <b>20-OH-LTB4</b>   | 0.2                       | ± 0.2    | 0.1                       | ± 0.1              | 0.34                |
| <b>20-COOH-LTB4</b> | 7.4                       | ± 6.2    | 7.3                       | ± 6.4              | 0.98                |
| <b>20-COOH-AA</b>   | 127.4                     | ± 101.2  | <b>270.8</b>              | <b>± 111.70.04</b> |                     |
| <b>LTC4</b>         | 4.1                       | ± 2.8    | <b>14.4</b>               | <b>± 8.5</b>       | <b>0.02</b>         |
| <b>PGD2</b>         | 2277.4                    | ± 864.6  | <b>3463.3</b>             | <b>± 806.50.04</b> |                     |
| <b>PGE2</b>         | 9571.6                    | ± 4057.6 | 15784.3                   | ± 7607.7           | 0.11                |
| <b>d15d12PGD2</b>   | 2.7                       | ± 1.9    | <b>7.0</b>                | <b>± 2.9</b>       | <b>0.01</b>         |
| <b>PGJ2</b>         | 2.1                       | ± 1.4    | <b>4.8</b>                | <b>± 1.7</b>       | <b>0.01</b>         |
| <b>d15d12PGJ2</b>   | <0.1                      | ± <0.1   | 0.1                       | ± 0.1              | 0.28                |
| <b>TXB2</b>         | 340.2                     | ± 87.6   | <b>491.2</b>              | <b>± 139.10.05</b> |                     |
| <b>8i-PGF2</b>      | 53.5                      | ± 9.0    | 56.2                      | ± 11.0             | 0.66                |
| <b>PGF2</b>         | 1016.7                    | ± 277.6  | 1010.9                    | ± 97.4             | 0.96                |
| <b>5-KETE</b>       | 0.3                       | ± 0.5    | 0.8                       | ± 0.9              | 0.24                |
| <b>12-KETE</b>      | 23.7                      | ± 16.7   | 30.2                      | ± 8.9              | 0.42                |
| <b>15-KETE</b>      | <0.1                      | ± <0.1   | <0.1                      | ± <0.1             | 1.00                |
| <b>LXB4</b>         | 0.2                       | ± 0.2    | 0.3                       | ± 0.6              | 0.78                |
| <b>LXA4</b>         | 1.3                       | ± 0.9    | 0.8                       | ± 0.9              | 0.39                |
| <b>HXA3</b>         | 42.4                      | ± 11.9   | 71.1                      | ± 48.0             | 0.19                |
| <b>HXB3</b>         | 0.7                       | ± 1.1    | 4.7                       | ± 11.3             | 0.41                |
| <b>EPA</b>          | 90.8                      | ± 34.7   | 62.5                      | ± 18.0             | 0.11                |
| <b>5-HEPE</b>       | 0.7                       | ± 0.4    | 0.6                       | ± 0.2              | 0.73                |
| <b>8-HEPE</b>       | 44.2                      | ± 22.5   | <b>74.5</b>               | <b>± 13.6</b>      | <b>0.02</b>         |
| <b>12-HEPE</b>      | 184.0                     | ± 98.2   | 278.4                     | ± 97.4             | 0.13                |
| <b>15-HEPE</b>      | 8.3                       | ± 4.5    | <b>33.1</b>               | <b>± 23.4</b>      | <b>0.03</b>         |
| <b>18-HEPE</b>      | 2.0                       | ± 1.5    | 3.4                       | ± 2.1              | 0.24                |
| <b>LTB5</b>         | 0.1                       | ± 0.2    | 0.2                       | ± 0.2              | 0.91                |
| <b>DHA</b>          | 403.2                     | ± 238.1  | 341.3                     | ± 81.0             | 0.56                |
| <b>4-HDHA</b>       | 0.6                       | ± 0.3    | 0.5                       | ± 0.3              | 0.30                |
| <b>10-HDHA</b>      | 4.9                       | ± 3.6    | 6.4                       | ± 1.0              | 0.36                |
| <b>14-HDHA</b>      | 249.0                     | ± 173.8  | <b>501.8</b>              | <b>± 153.70.02</b> |                     |
| <b>17-HDHA</b>      | 48.4                      | ± 38.7   | <b>144.6</b>              | <b>± 98.2</b>      | <b>0.05</b>         |
| <b>20-HDHA</b>      | 8.2                       | ± 2.9    | 8.9                       | ± 2.0              | 0.63                |
| <b>RvD1</b>         | 0.1                       | ± 0.1    | 1.3                       | ± 2.2              | 0.24                |
| <b>RvD2</b>         | 1.2                       | ± 1.1    | 5.2                       | ± 7.2              | 0.21                |
| <b>MAR</b>          | 0.2                       | ± 0.2    | 0.2                       | ± 0.2              | 0.73                |
| <b>PD1</b>          | 3.3                       | ± 2.2    | <b>19.8</b>               | <b>± 19.6</b>      | <b>0.04</b>         |
| <b>LA</b>           | 356.7                     | ± 118.9  | 316.5                     | ± 26.6             | 0.44                |
| <b>9-HODE</b>       | 722.4                     | ± 286.6  | 717.6                     | ± 84.8             | 0.97                |
| <b>13-HODE</b>      | 627.4                     | ± 299.6  | 854.7                     | ± 395.5            | 0.29                |
| <b>13-KODE</b>      | 97.1                      | ± 69.5   | 104.3                     | ± 44.8             | 0.84                |

**Supplementary table 2:** The concentration of lipid mediators in lung samples from base diet fed RWE-sensitized / PBS-challenged gerbils (C-) (n=6), base diet fed RWE-sensitized / RWE-challenged gerbils (C+) (n=6), lycopene-supplemented RWE-sensitized / PBS-challenged gerbils (L-) (n=6) and lycopene-supplemented RWE-sensitized / PBS-challenged gerbils (L+) (n=6) were measured by HPLC-MS-MS. Results in ng/g lung tissue are expressed as mean  $\pm$  SEM. The numbers in bold letters represent significant difference vs. RWE-challenged animals ( $P < 0.05$ , Mann-Whitney test). For abbreviations, see materials and methods.

|                     | C-                  | C+                                | L-                  | L+                                     | Significance |             |             |             |
|---------------------|---------------------|-----------------------------------|---------------------|----------------------------------------|--------------|-------------|-------------|-------------|
|                     | conc. in ng/g       | conc. in ng/g                     | conc. in ng/g       | con. In ng/g                           | C-:C+        | L-:L+       | C-:L-       | C+/L+       |
| <b>AA</b>           | 1042.4 $\pm$ 74.7   | 1493.8 $\pm$ 879.9                | 1021.0 $\pm$ 325.6  | 1098.3 $\pm$ 308.5                     | 0.14         | 0.71        | 0.47        | 0.18        |
| <b>5-HETE</b>       | 1.9 $\pm$ 2.8       | 6.1 $\pm$ 8.3                     | 1.6 $\pm$ 0.9       | 2.3 $\pm$ 2.0                          | 0.13         | 0.24        | 0.40        | 0.17        |
| <b>8-HETE</b>       | 4.7 $\pm$ 5.7       | <b>24.3 <math>\pm</math> 33.6</b> | 5.4 $\pm$ 6.2       | 6.3 $\pm$ 5.9                          | <b>0.04</b>  | 0.41        | 0.43        | 0.14        |
| <b>11-HETE</b>      | 49.6 $\pm$ 79.1     | 54.8 $\pm$ 76.3                   | 69.2 $\pm$ 55.8     | 72.1 $\pm$ 41.4                        | 0.45         | 0.46        | 0.33        | 0.33        |
| <b>12-HETE</b>      | 385.0 $\pm$ 616.0   | 437.2 $\pm$ 517.4                 | 228.9 $\pm$ 253.4   | 187.5 $\pm$ 147.8                      | 0.44         | 0.38        | 0.31        | 0.16        |
| <b>15-HETE</b>      | 30.7 $\pm$ 45.6     | 58.1 $\pm$ 72.5                   | 41.4 $\pm$ 40.7     | 46.2 $\pm$ 30.1                        | 0.23         | 0.42        | 0.35        | 0.37        |
| <b>20-HETE</b>      | 2.3 $\pm$ 1.1       | 2.0 $\pm$ 1.5                     | 3.5 $\pm$ 1.7       | 2.7 $\pm$ 1.6                          | 0.32         | 0.24        | 0.11        | 0.23        |
| <b>LTB4</b>         | 0.2 $\pm$ <0.1      | <b>0.5 <math>\pm</math> 0.1</b>   | 0.1 $\pm$ <0.1      | <b>0.1 <math>\pm</math> &lt;0.1</b>    | <b>0.04</b>  | 0.17        | 0.10        | <b>0.05</b> |
| <b>20-OH-LTB4</b>   | 0.5 $\pm$ 0.9       | 0.2 $\pm$ 0.2                     | 0.2 $\pm$ 0.1       | 0.2 $\pm$ 0.1                          | 0.18         | 0.23        | 0.18        | 0.40        |
| <b>20-COOH-LTB4</b> | 3.9 $\pm$ 1.2       | 2.3 $\pm$ 2.0                     | 1.7 $\pm$ 1.0       | 2.3 $\pm$ 0.5                          | 0.06         | 0.14        | <b>0.01</b> | 0.49        |
| <b>20-COOH-AA</b>   | 6.8 $\pm$ 10.4      | 8.6 $\pm$ 11.8                    | 2.4 $\pm$ 2.9       | 2.0 $\pm$ 2.4                          | 0.39         | 0.42        | 0.19        | 0.13        |
| <b>LTC4</b>         | 0.7 $\pm$ 0.5       | 0.8 $\pm$ 0.4                     | 0.4 $\pm$ 0.3       | 0.5 $\pm$ 0.4                          | 0.32         | 0.28        | 0.13        | 0.14        |
| <b>PGD2</b>         | 235 $\pm$ 84.5      | 229.9 $\pm$ 58.2                  | 558.4 $\pm$ 44.4    | <b>836.8 <math>\pm</math> 80.0</b>     | 0.49         | 0.14        | 0.09        | <b>0.01</b> |
| <b>PGE2</b>         | 2525.2 $\pm$ 4475.1 | 3090.8 $\pm$ 3562.5               | 8313.6 $\pm$ 6709.6 | <b>10024.4 <math>\pm</math> 7173.9</b> | 0.41         | 0.35        | 0.06        | <b>0.03</b> |
| <b>d15d12PGD2</b>   | 0.9 $\pm$ 1.0       | 0.7 $\pm$ 0.6                     | 1.8 $\pm$ 0.9       | <b>3.6 <math>\pm</math> 2.5</b>        | 0.39         | 0.09        | 0.07        | <b>0.01</b> |
| <b>PGJ2</b>         | 0.6 $\pm$ 0.6       | 0.5 $\pm$ 0.6                     | 1.0 $\pm$ 0.4       | <b>1.4 <math>\pm</math> 0.8</b>        | 0.38         | 0.19        | 0.12        | <b>0.03</b> |
| <b>d15d12PGJ2</b>   | 0.1 $\pm$ <0.1      | 0.1 $\pm$ <0.1                    | 0.1 $\pm$ <0.1      | <b>0.1 <math>\pm</math> &lt;0.1</b>    | 0.50         | -           | <b>0.04</b> | <b>0.04</b> |
| <b>TXB2</b>         | 0.5 $\pm$ 0.5       | 0.3 $\pm$ 0.2                     | 0.4 $\pm$ 0.2       | 0.3 $\pm$ 0.3                          | 0.24         | 0.45        | 0.37        | 0.37        |
| <b>8i-PGF2</b>      | 0.7 $\pm$ 0.6       | 0.5 $\pm$ 0.8                     | 0.6 $\pm$ 0.3       | 1.0 $\pm$ 0.7                          | 0.36         | 0.15        | 0.39        | 0.18        |
| <b>PGF2</b>         | 89.0 $\pm$ 111.3    | 47.7 $\pm$ 62.7                   | 123.5 $\pm$ 42.5    | <b>178.9 <math>\pm</math> 92.8</b>     | 0.22         | 0.13        | 0.27        | <b>0.01</b> |
| <b>5-KETE</b>       | 0.2 $\pm$ 0.2       | 0.2 $\pm$ 0.2                     | 0.3 $\pm$ 0.1       | 0.2 $\pm$ 0.1                          | 0.45         | 0.14        | 0.40        | 0.33        |
| <b>12-KETE</b>      | 4.1 $\pm$ 5.7       | 8.5 $\pm$ 12.7                    | 2.0 $\pm$ 2.4       | 1.7 $\pm$ 0.7                          | 0.23         | 0.40        | 0.23        | 0.13        |
| <b>15-KETE</b>      | 0.6 $\pm$ 0.5       | 0.5 $\pm$ 0.5                     | 0.2 $\pm$ <0.1      | <b>0.4 <math>\pm</math> 0.2</b>        | 0.32         | <b>0.02</b> | <b>0.04</b> | 0.35        |
| <b>LXB4</b>         | 0.1 $\pm$ <0.1      | 0.1 $\pm$ <0.1                    | 0.4 $\pm$ 0.6       | <b>0.4 <math>\pm</math> 0.4</b>        | 0.50         | 0.47        | 0.15        | <b>0.04</b> |
| <b>LXA4</b>         | 0.1 $\pm$ <0.1      | 0.1 $\pm$ <0.1                    | 0.2 $\pm$ <0.1      | 0.6 $\pm$ 0.2                          | 0.17         | 0.20        | 0.15        | 0.15        |
| <b>HXA3</b>         | 2.3 $\pm$ 1.8       | 5.8 $\pm$ 6.0                     | 3.5 $\pm$ 4.9       | 2.2 $\pm$ 1.3                          | 0.10         | 0.29        | 0.29        | 0.12        |
| <b>HXB3</b>         | 0.1 $\pm$ <0.1      | 0.1 $\pm$ <0.1                    | 0.1 $\pm$ <0.1      | <b>0.1 <math>\pm</math> &lt;0.1</b>    | 0.17         | -           | 0.19        | <b>0.04</b> |
| <b>EPA</b>          | 73.7 $\pm$ 61.3     | 99.1 $\pm$ 81.8                   | 73.6 $\pm$ 32.0     | 69.2 $\pm$ 15.4                        | 0.28         | 0.39        | 0.50        | 0.22        |
| <b>5-HEPE</b>       | 0.2 $\pm$ 0.1       | 0.3 $\pm$ 0.3                     | 0.1 $\pm$ <0.1      | 0.2 $\pm$ 0.2                          | 0.16         | 0.24        | 0.30        | 0.24        |
| <b>8-HEPE</b>       | 4.7 $\pm$ 7.8       | 5.3 $\pm$ 7.6                     | 2.0 $\pm$ 2.8       | 1.9 $\pm$ 2.3                          | 0.45         | 0.48        | 0.25        | 0.19        |
| <b>12-HEPE</b>      | 20.0 $\pm$ 31.0     | 19.9 $\pm$ 26.9                   | 7.6 $\pm$ 11.3      | 7.9 $\pm$ 10.5                         | 0.50         | 0.48        | 0.21        | 0.29        |
| <b>15-HEPE</b>      | 0.7 $\pm$ 0.7       | 2.3 $\pm$ 3.0                     | 1.3 $\pm$ 1.8       | 1.6 $\pm$ 2.3                          | 0.12         | 0.41        | 0.26        | 0.33        |
| <b>18-HEPE</b>      | 0.7 $\pm$ 0.9       | 1.3 $\pm$ 0.8                     | 1.5 $\pm$ 0.8       | 1.2 $\pm$ 0.5                          | 0.15         | 0.24        | 0.09        | 0.40        |
| <b>LTB5</b>         | 0.1 $\pm$ <0.1      | 0.1 $\pm$ <0.1                    | 0.1 $\pm$ <0.1      | 0.2 $\pm$ 0.2                          | 0.50         | 0.17        | <b>0.04</b> | 0.15        |
| <b>DHA</b>          | 118.0 $\pm$ 89.6    | 133.5 $\pm$ 134.9                 | 92.5 $\pm$ 38.7     | 81.5 $\pm$ 13.9                        | 0.41         | 0.28        | 0.29        | 0.21        |
| <b>4-HDHA</b>       | 0.1 $\pm$ <0.1      | 0.1 $\pm$ <0.1                    | 0.1 $\pm$ <0.1      | 0.1 $\pm$ <0.1                         | 0.17         | -           | <b>0.04</b> | 0.19        |
| <b>10-HDHA</b>      | 0.2 $\pm$ 0.1       | 1.0 $\pm$ 1.3                     | 0.2 $\pm$ 0.2       | 0.3 $\pm$ 0.3                          | 0.07         | 0.27        | 0.49        | 0.12        |
| <b>14-HDHA</b>      | 15.7 $\pm$ 17.2     | <b>74.3 <math>\pm</math> 89.2</b> | 20.1 $\pm$ 24.3     | 25.8 $\pm$ 26.4                        | <b>0.05</b>  | 0.37        | 0.37        | 0.14        |
| <b>17-HDHA</b>      | 1.4 $\pm$ 1.9       | 2.8 $\pm$ 3.7                     | 1.4 $\pm$ 1.3       | 1.3 $\pm$ 0.6                          | 0.21         | 0.44        | 0.48        | 0.20        |
| <b>20-HDHA</b>      | 0.2 $\pm$ 0.2       | 0.6 $\pm$ 0.9                     | 0.5 $\pm$ 0.5       | 0.3 $\pm$ 0.2                          | 0.14         | 0.25        | 0.12        | 0.23        |
| <b>RvD1</b>         | 0.1 $\pm$ <0.1      | 0.1 $\pm$ <0.1                    | 0.1 $\pm$ <0.1      | 0.4 $\pm$ 0.5                          | 0.17         | 0.12        | <b>0.04</b> | 0.10        |
| <b>RvD2</b>         | 2.2 $\pm$ 1.6       | <b>5.3 <math>\pm</math> 4.3</b>   | 4.4 $\pm$ 2.4       | <b>2.0 <math>\pm</math> 1.1</b>        | <b>0.05</b>  | <b>0.03</b> | <b>0.05</b> | 0.06        |
| <b>MAR</b>          | 0.1 $\pm$ <0.1      | <b>0.3 <math>\pm</math> 0.2</b>   | 0.2 $\pm$ 0.1       | <b>0.1 <math>\pm</math> &lt;0.1</b>    | <b>0.03</b>  | <b>0.03</b> | <b>0.05</b> | <b>0.03</b> |
| <b>PD1</b>          | 0.1 $\pm$ <0.1      | 0.2 $\pm$ 0.2                     | 0.1 $\pm$ <0.1      | 0.1 $\pm$ <0.1                         | 0.12         | -           | 0.19        | 0.11        |
| <b>LA</b>           | 324.0 $\pm$ 238.0   | 416.5 $\pm$ 343.6                 | 261.3 $\pm$ 90.2    | 251.9 $\pm$ 73.1                       | 0.30         | 0.43        | 0.30        | 0.16        |

|                |             |              |              |              |      |      |      |      |
|----------------|-------------|--------------|--------------|--------------|------|------|------|------|
| <b>9-HODE</b>  | 56.5 ± 68.4 | 98.7 ± 110.7 | 80.5 ± 48.5  | 98.3 ± 59.2  | 0.22 | 0.31 | 0.26 | 0.50 |
| <b>13-HODE</b> | 68.7 ± 87.5 | 68.9 ± 84.3  | 100.9 ± 51.6 | 118.8 ± 70.3 | 0.50 | 0.33 | 0.24 | 0.16 |
| <b>13-KODE</b> | 9.2 ± 4.8   | 8.5 ± 5.3    | 11.8 ± 1.6   | 9.1 ± 4.3    | 0.40 | 0.11 | 0.14 | 0.42 |
